# Supplementary material
Source: publisher figshare collection journal article supplement (https://tandf.figshare.com/articles/dataset/_/1384855)
Supplement: Supplementary file 1 [file 5]

|    | Relative gene expression levels |                  | LNCaP*   |         |          |         |            |  | VCAP     |         |          |         |
|----|---------------------------------|------------------|----------|---------|----------|---------|------------|--|----------|---------|----------|---------|
|    | gene symbol                     | accession number | LD_hyper | LD_hypo | MD_hyper | MD_hypo | confluency |  | LD_hyper | LD_hypo | MD_hyper | MD_hypo |
|    | GADPH                           | AF261085         | 1,0      | 1,0     | 1,0      | 1,0     | 1,0        |  | 1,0      | 1,0     | 1,0      | 1,0     |
| 1  | CDKN1A                          | NM_000389        | 11,4     | 3,6     | 1,9      | 1,0     | 1,3        |  | 21,4     | 8,3     | 1,2      | 1,0     |
| 2  | CCNA2                           | NM_001237        | 0,3      | 0,6     | 0,8      | 1,0     | 0,3        |  | 0,4      | 0,6     | 1,1      | 1,0     |
| 3  | MDM2                            | NM_002392        | 1,5      | 1,0     | 1,0      | 1,0     | -          |  | -        | -       | -        | -       |
| 4  | PIG3                            | NM_004881        | 3,3      | 2,0     | 1,2      | 1,0     | 1,2        |  | 8,4      | 2,4     | 1,8      | 1,0     |
| 5  | GADD45A                         | NM_001924        | 5,5      | 2,0     | 0,7      | 1,0     | 4,0        |  | 0,4      | 0,3     | 0,6      | 1,0     |
| 6  | KLF4                            | AF105036         | 1,9      | 1,0     | 0,7      | 1,0     | 0,8        |  | 7,1      | 3,4     | 0,9      | 1,0     |
| 7  | KLF6                            | NM_005655        | 3,1      | 1,6     | 0,7      | 1,0     | 0,6        |  | 1,5      | 0,7     | 1,2      | 1,0     |
| 8  | KLF10                           | NM_005655        | 2,6      | 1,6     | 0,8      | 1,0     | 2,2        |  | 1,2      | 1,0     | 1,1      | 1,0     |
| 9  | KRT19                           | NM_002276        | 25,4     | 6,4     | 1,0      | 1,0     | 1,1        |  | 6,1      | 5,1     | 1,2      | 1,0     |
| 10 | KLK3                            | BC056665         | 2,7      | 1,2     | 0,5      | 1,0     | 0,6        |  | 35,1     | 10,2    | 1,8      | 1,0     |
| 11 | AR                              | M23263           | 2,6      | 1,5     | 0,8      | 1,0     | 1,2        |  | 0,6      | 0,4     | 0,8      | 1,0     |
| 12 | CDH1                            | AB025106         | 2,3      | 1,3     | 0,9      | 1,0     | 1,6        |  | 2,5      | 1,3     | 1,6      | 1,0     |
| 13 | GDF11                           | NM_005811        | 2,7      | 2,1     | 1,2      | 1,0     | 0,8        |  | 1,9      | 0,8     | 1,5      | 1,0     |
| 14 | BMP1                            | NM_001199        | 3,2      | 1,2     | 0,7      | 1,0     | 1,3        |  | 2,3      | 1,5     | 1,5      | 1,0     |
| 15 | BMP4                            | BC020546         | 4,3      | 2,6     | 1,1      | 1,0     | 2,2        |  | 3,5      | 2,0     | 1,6      | 1,0     |
| 16 | SMAD6                           | NM_005585        | 6,1      | 2,7     | 1,5      | 1,0     | 0,3        |  | 13,3     | 9,4     | 1,4      | 1,0     |
| 17 | SMAD7                           | NM_005904        | 13,1     | 7,9     | 1,1      | 1,0     | 0,5        |  | 7,3      | 3,2     | 1,3      | 1,0     |
| 18 | ID1                             | NM_002165        | 7,3      | 2,8     | 0,9      | 1,0     | 0,1        |  | 47,2     | 22,7    | 1,1      | 1,0     |
| 19 | HES1                            | NM_005524        | 4,6      | 4,2     | 0,9      | 1,0     | 1,4        |  | 1,6      | 1,3     | 1,3      | 1,0     |
| 20 | OCT4A                           | NM_002701        | 3,1      | 2,8     | 1,0      | 1,0     | 0,3        |  | 4,6      | 2,3     | 0,8      | 1,0     |
| 21 | PTCH1                           | NM_001083602     | 12,1     | 4,1     | 1,2      | 1,0     | 0,4        |  | 3,1      | 1,6     | 0,8      | 1,0     |
| 22 | HMOX1                           | NM_002133        | 10,5     | 5,3     | 2,5      | 1,0     | -          |  | 5,3      | 3,0     | 1,3      | 1,0     |
| 23 | AKR1C1                          | NM_001083602     | 74,7     | 19,1    | 0,8      | 1,0     | -          |  | 6,0      | 2,0     | 0,9      | 1,0     |
| 24 | NQO1                            | NM_000903        | 3,2      | 4,1     | 0,5      | 1,0     | -          |  | 2,3      | 1,9     | 0,9      | 1,0     |
