# Supplementary material
Source: publisher figshare collection journal article supplement (https://tandf.figshare.com/articles/dataset/_/1384855)

A

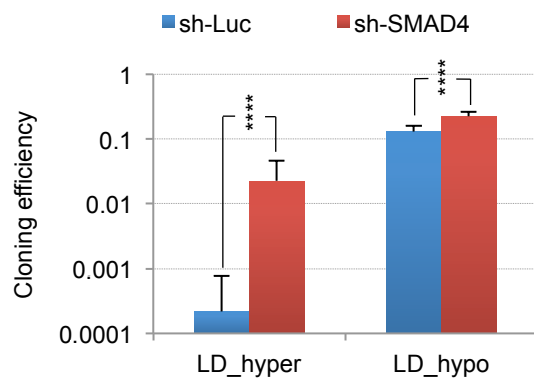

B

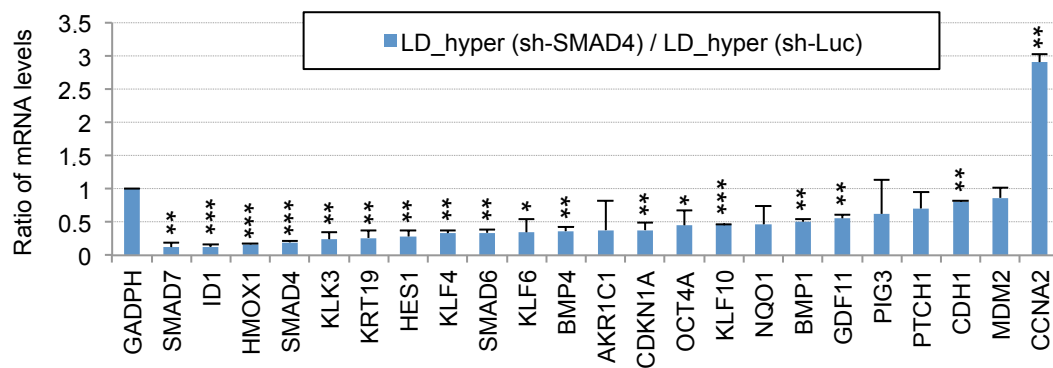

C

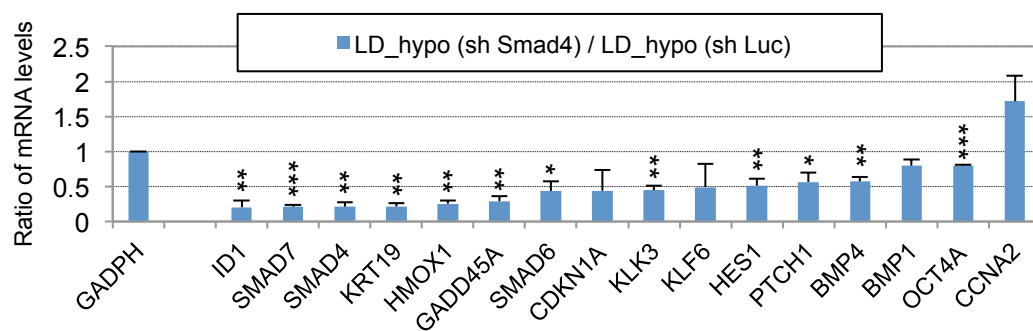

Supplement: Supplementary file 2 [file 5]

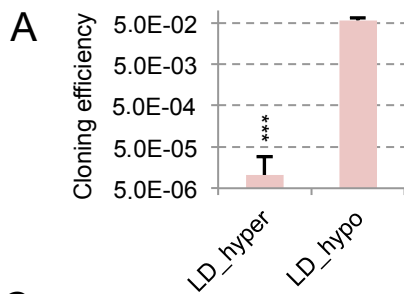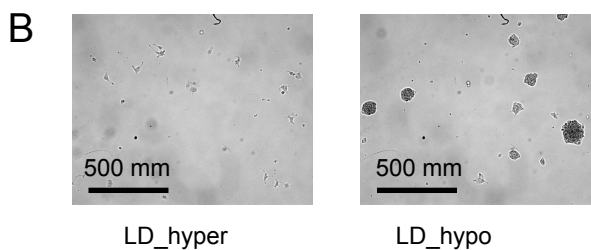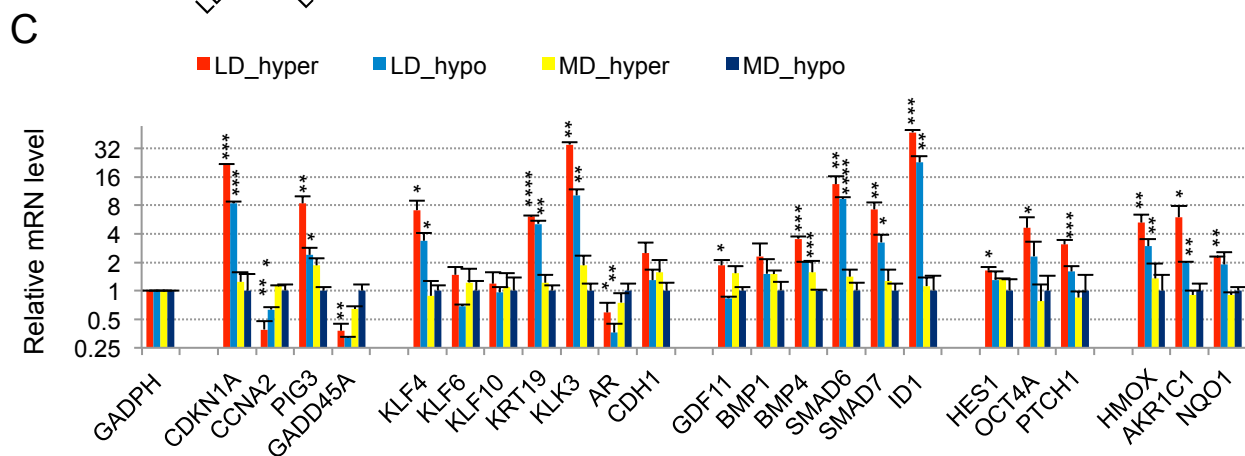

Supplement: Supplementary file 3 [file 5]

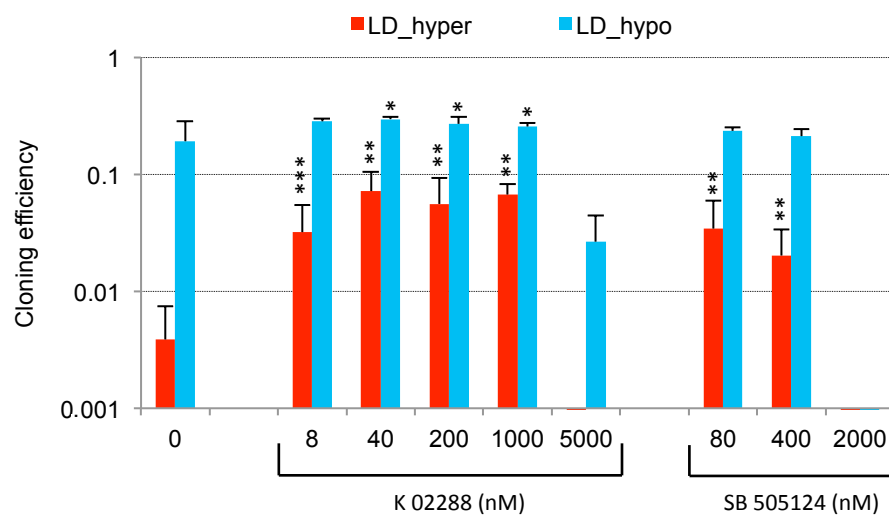

Supplement: Supplementary file 4 [file 5]
